# Supplementary material
Source: PubMed Central journal article supplement (PMC4352123)
Supplement: NIHMS656783-supplement-1.pdf [file NIHMS656783-supplement-1.pdf]

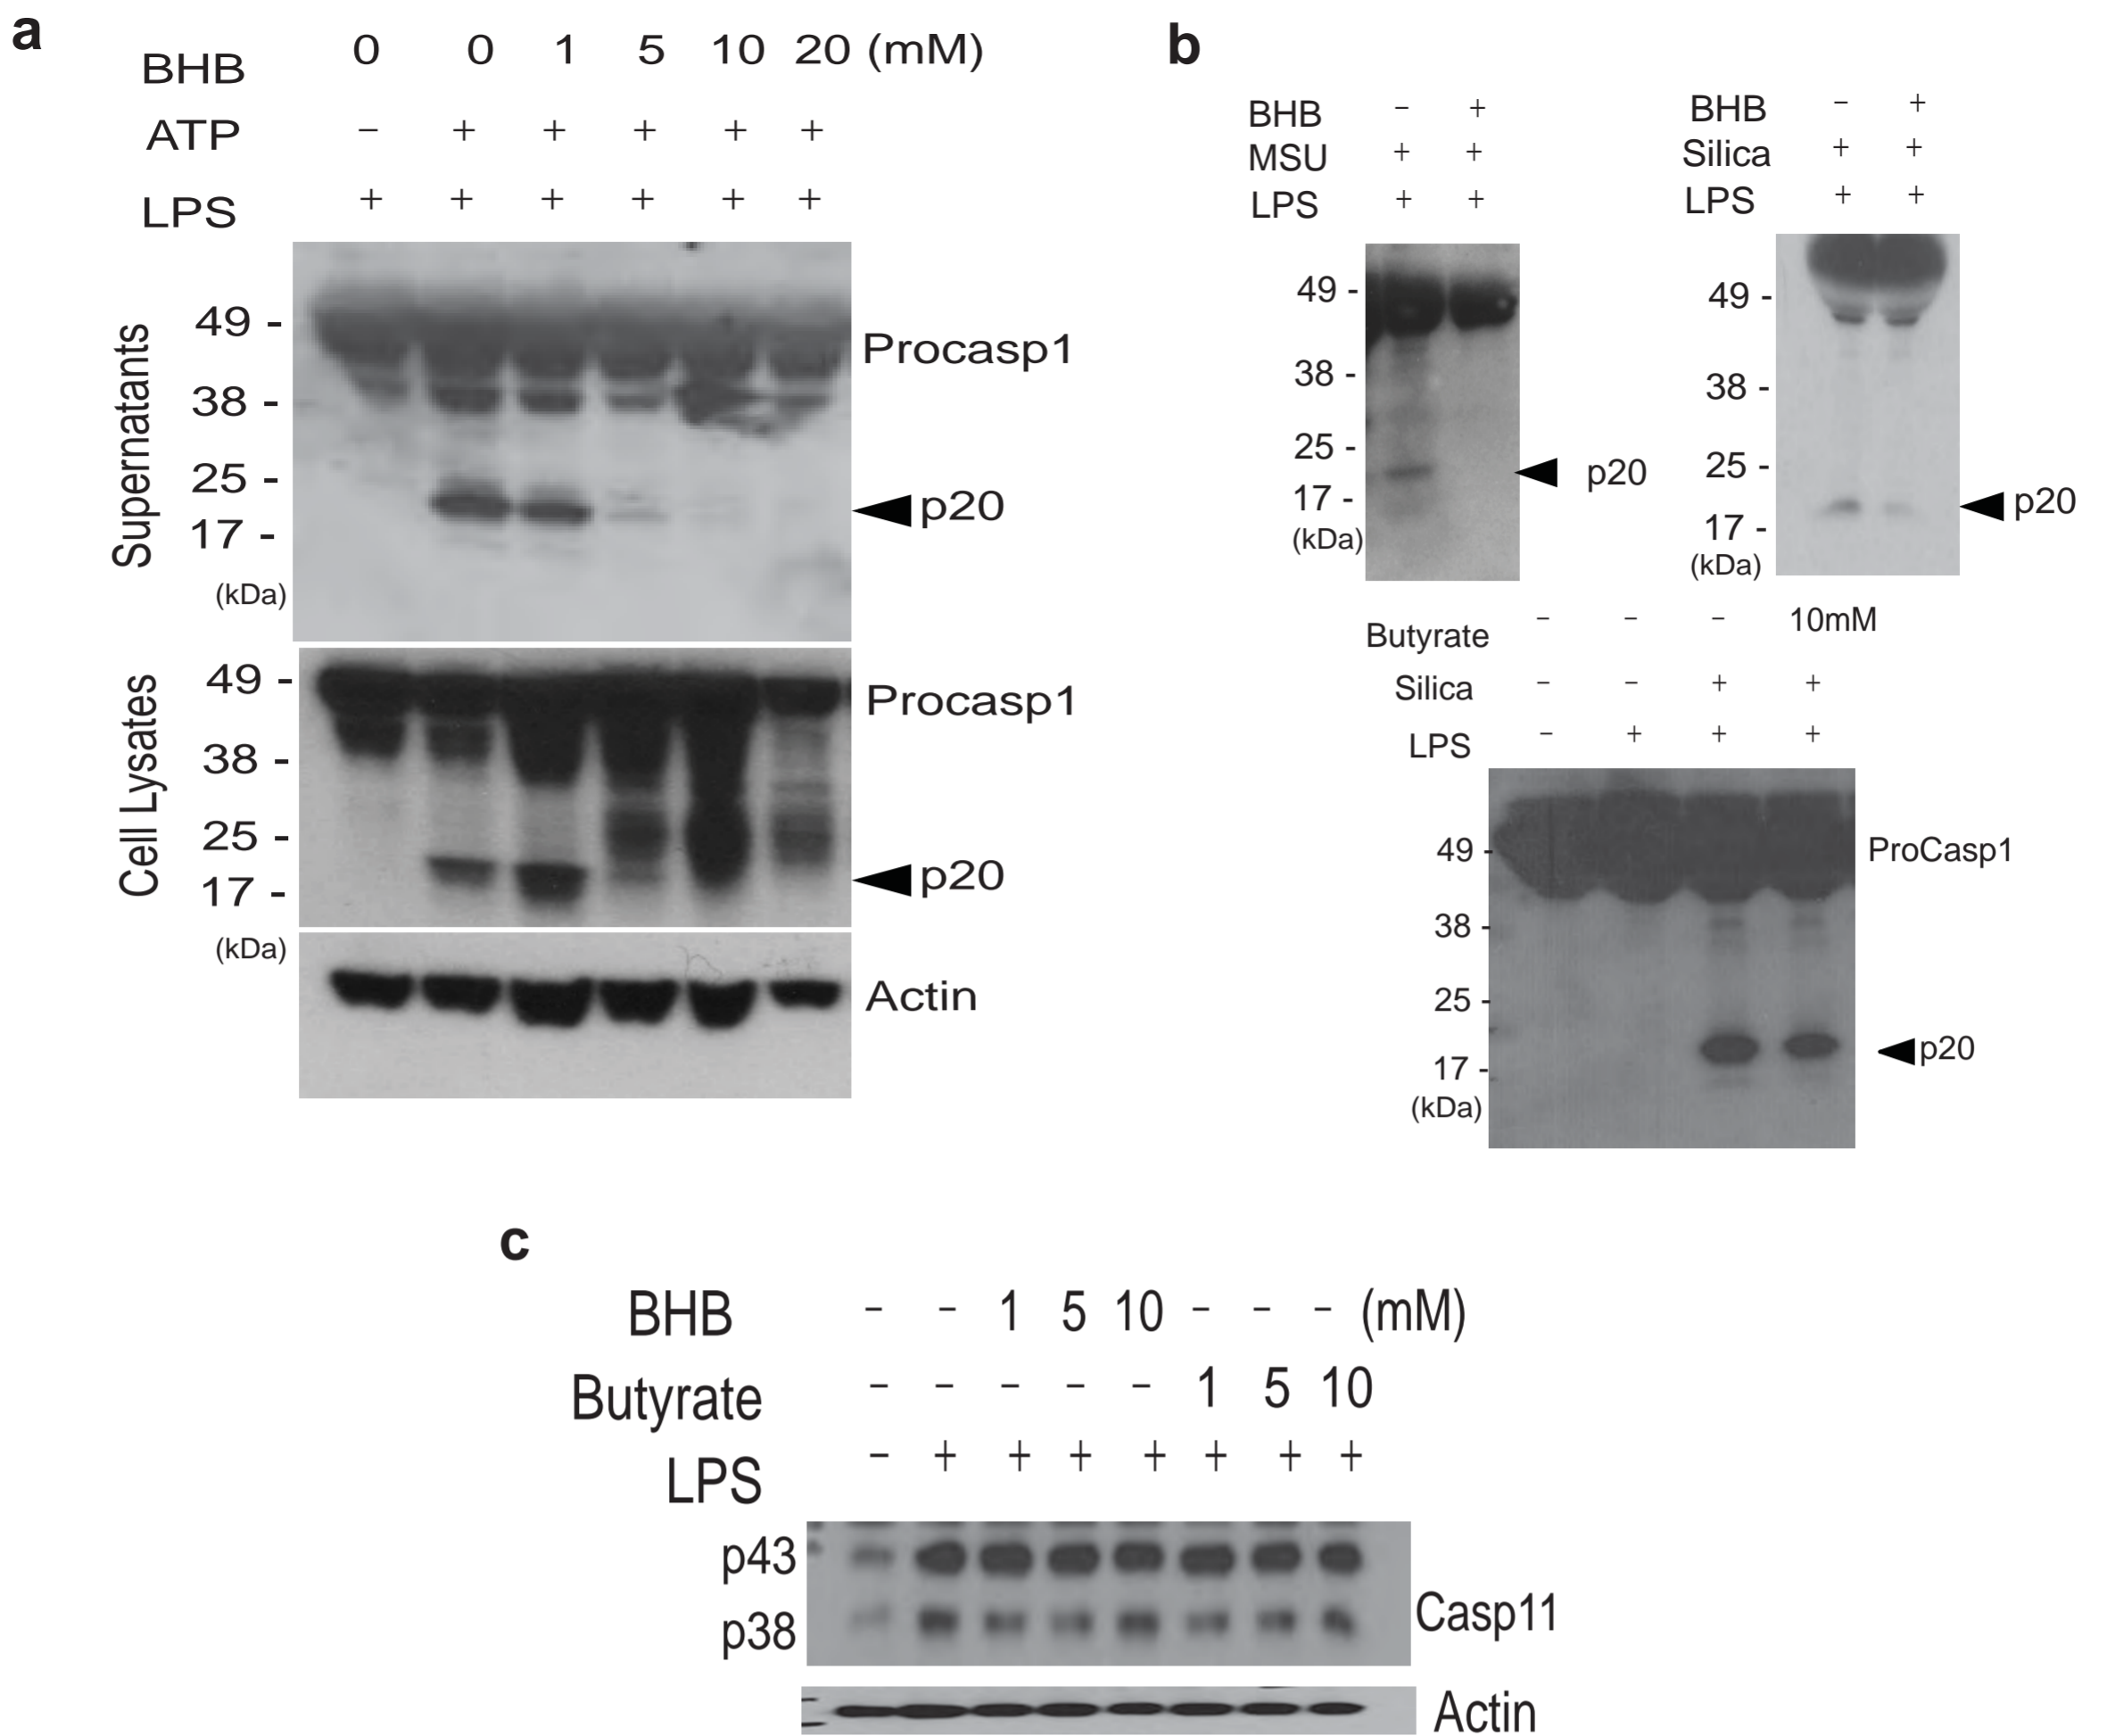

**Supplementary Figure 1** Effect of BHB on inflammasome activation

- (a) Western blot analysis of caspase1 (active subunit p20) in supernatant and cell lysates of BMDMs primed with LPS for 4 hours and stimulated with ATP for 1 hour in presence of various concentration of D-BHB.
- (b) Western blot analysis of caspase1 in BMDMs primed with LPS for 4 hours and stimulated with MSU, Silica for 1 hour in presence of various D-BHB and butyrate (10mM). These experiments were repeated more than 12 times with different combination of treatments.
- (c) The immunoblot analysis of caspase-11 in BMDMs treated with LPS for 4h and incubated with BHB and butyrate for 1h.

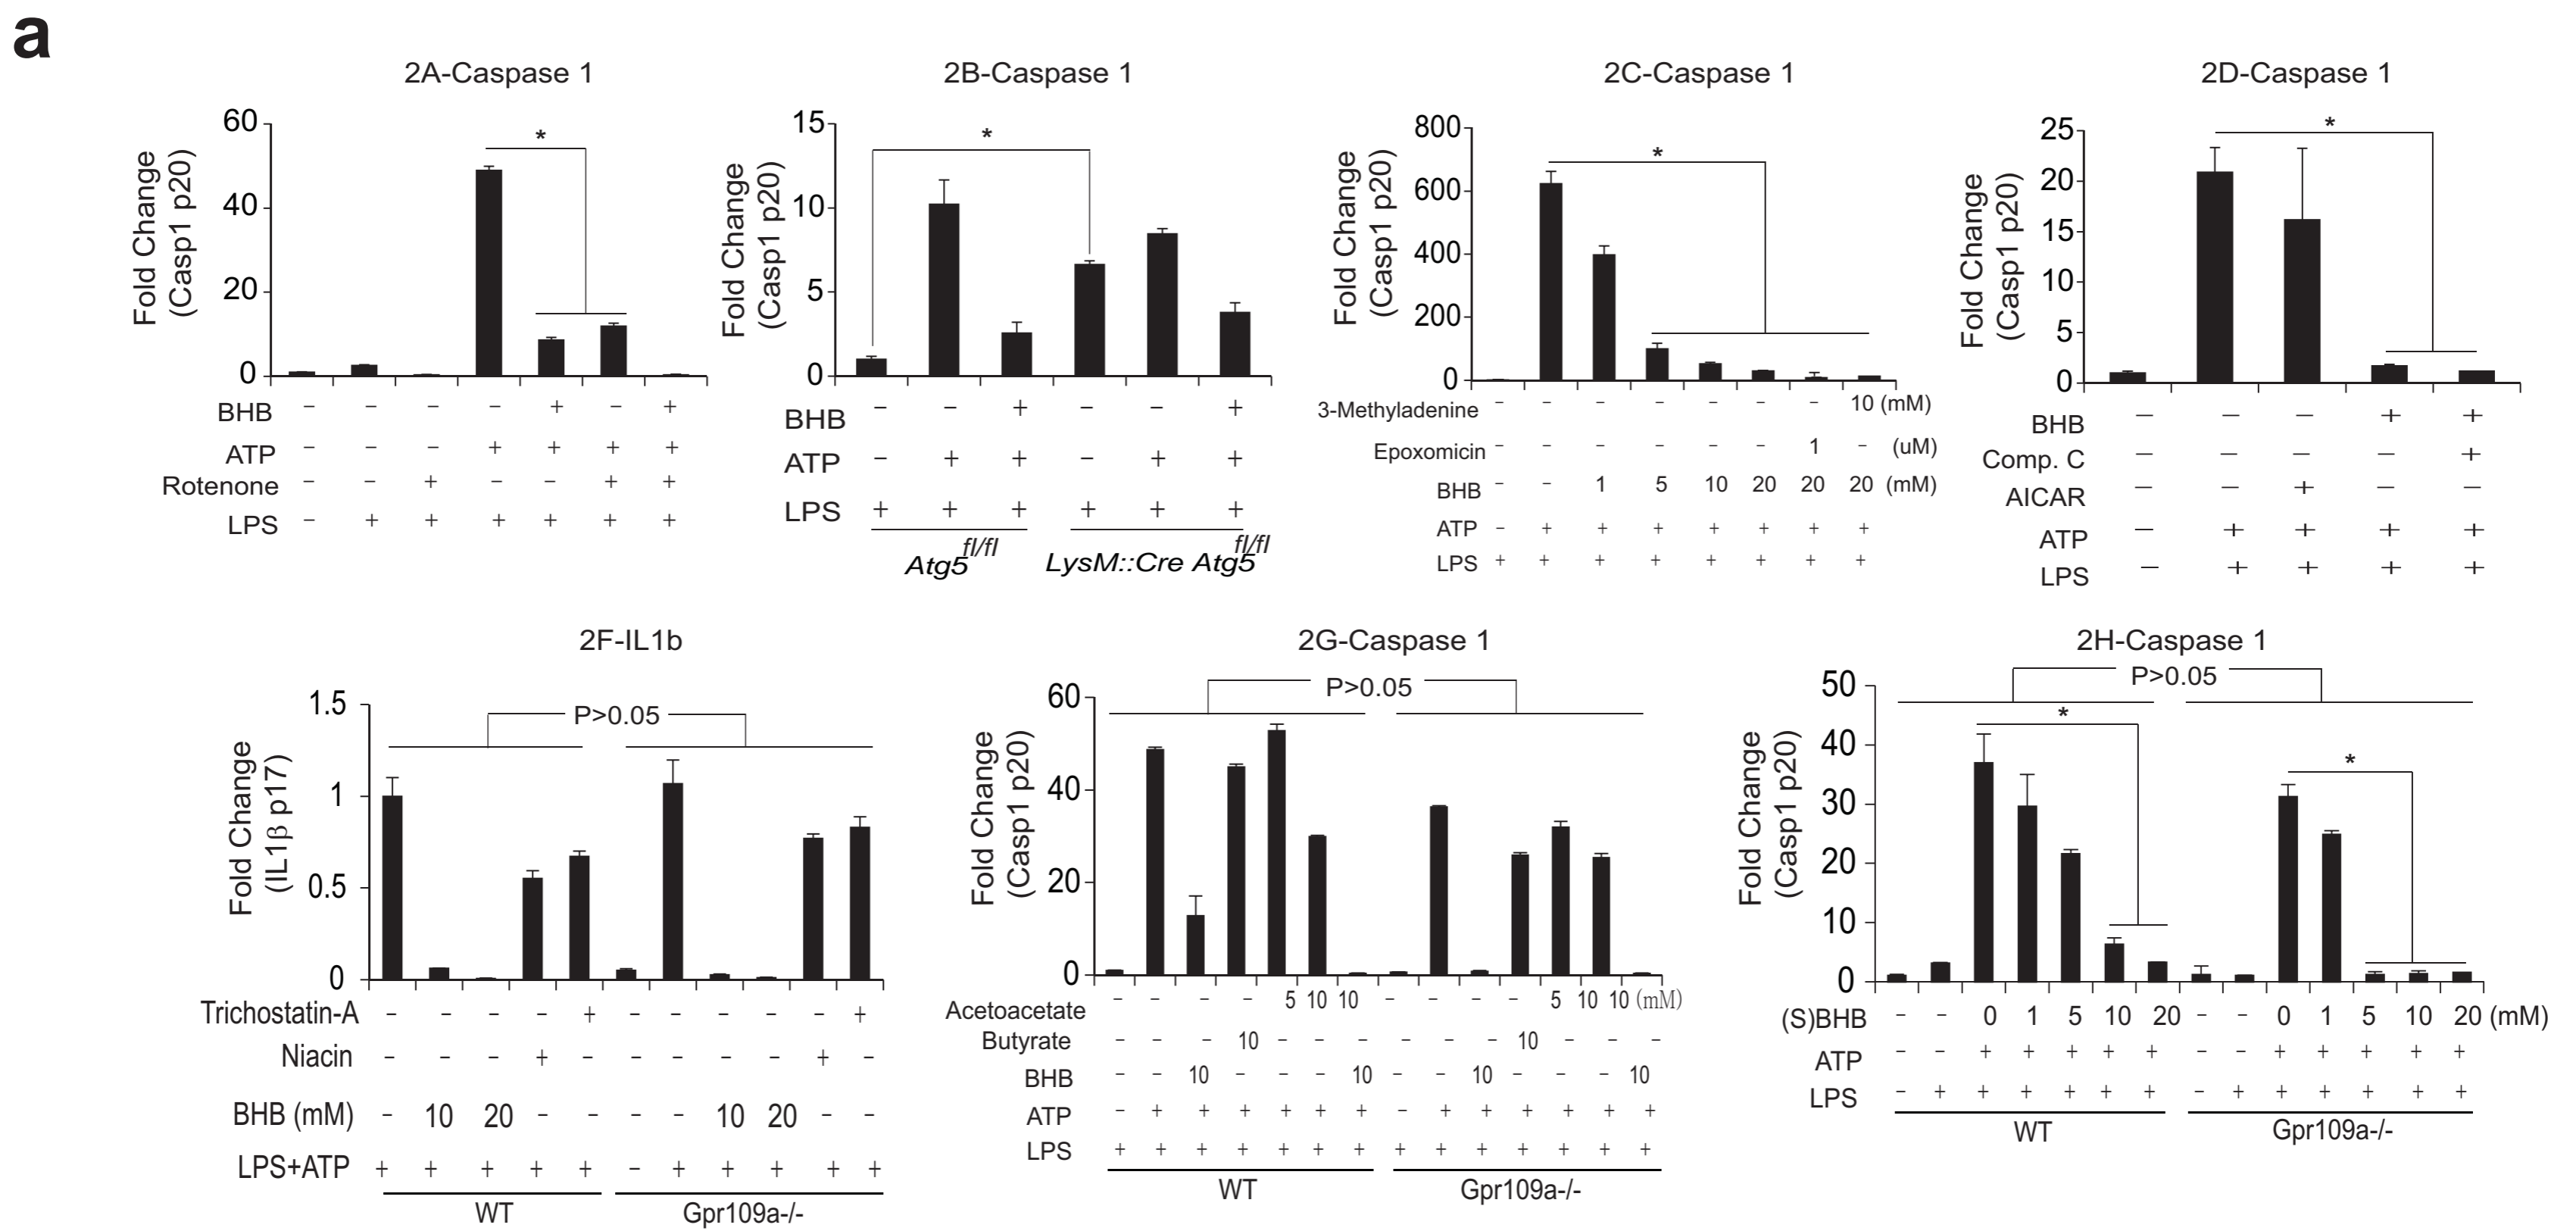

**b**

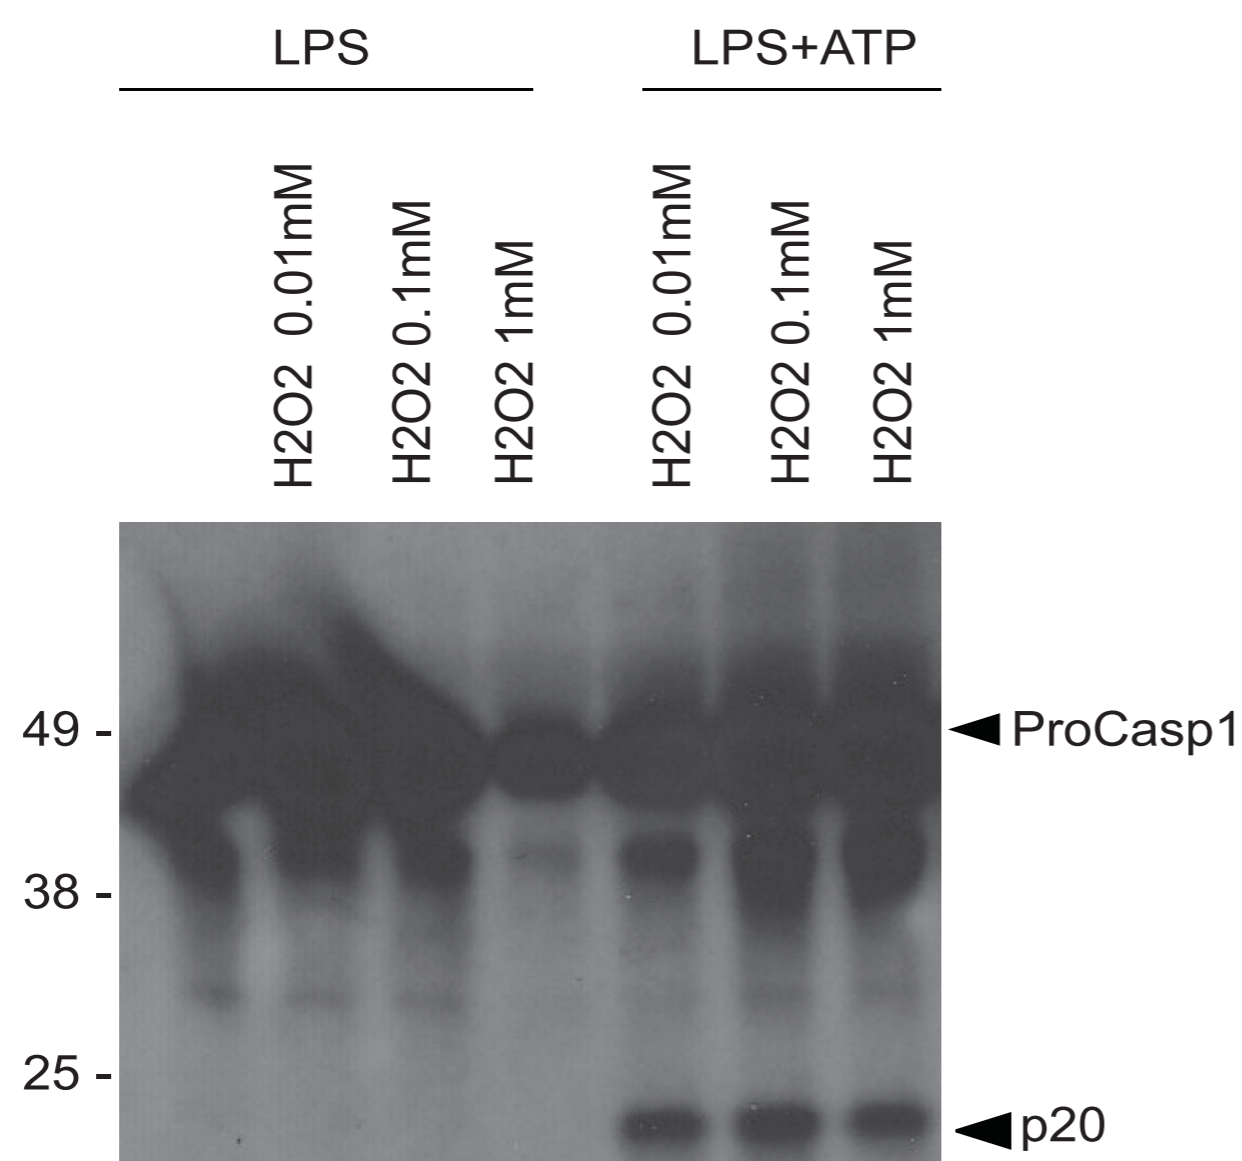

**c**

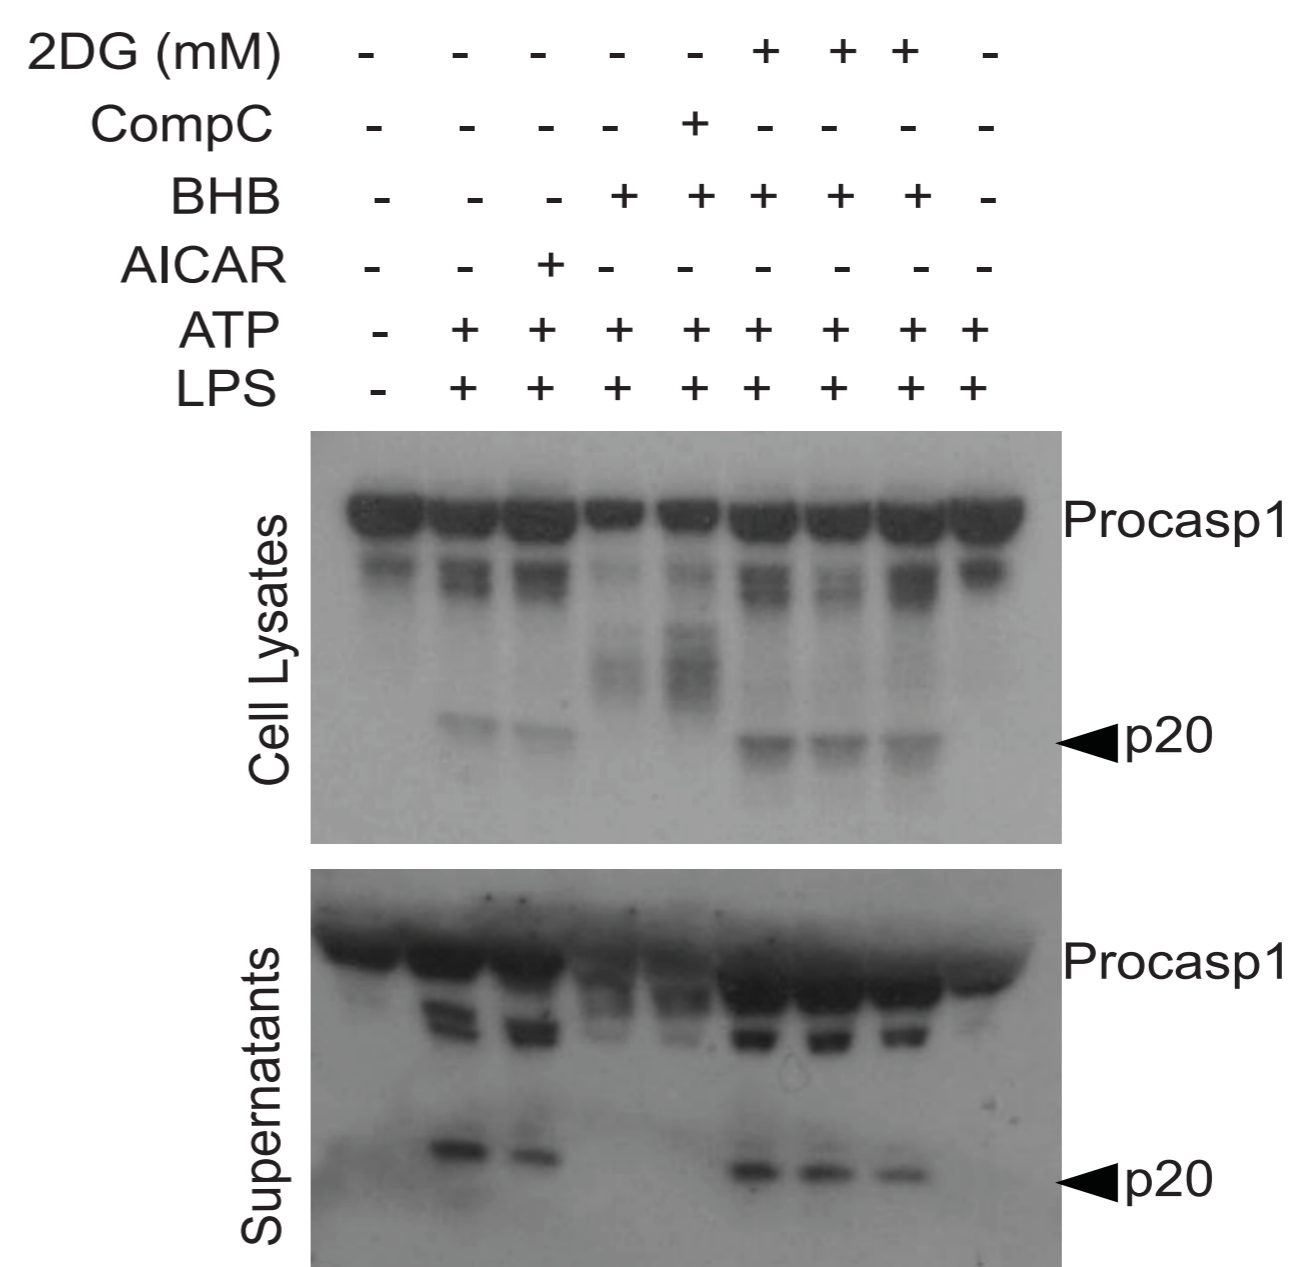

**Supplementary Figure 2 BHB does not require ROS and AMPK to block NLRP3.**

- (a) All bar graphs represent quantitation of p20 caspase1 and p17 band intensity as fold change by normalizing to inactive p48 procaspase-1 and proIL1 $\beta$ . Data are expressed as mean  $\pm$  S.E.M (\* $p < 0.05$ ) from cells derived from six (a) 4 (b) ten (c, d, e) and four (f-h) mice with each independent experiment each carried out in triplicate.
- (b) Western blot analysis of caspase1 in BMDMs primed with LPS for 4 hours and stimulated with hydrogen peroxide alone and with ATP for 1 hour.
- (c) Caspase-1 western blot in LPS primed BMDM stimulated with ATP and BHB (10mM) in presence of glycolytic inhibitor 2-Deoxyglucose (1mM), AMPK activator (AICAR, 2mM) and AMPK antagonist Compound C (25  $\mu$ M). The experiments were repeated thrice.

**a**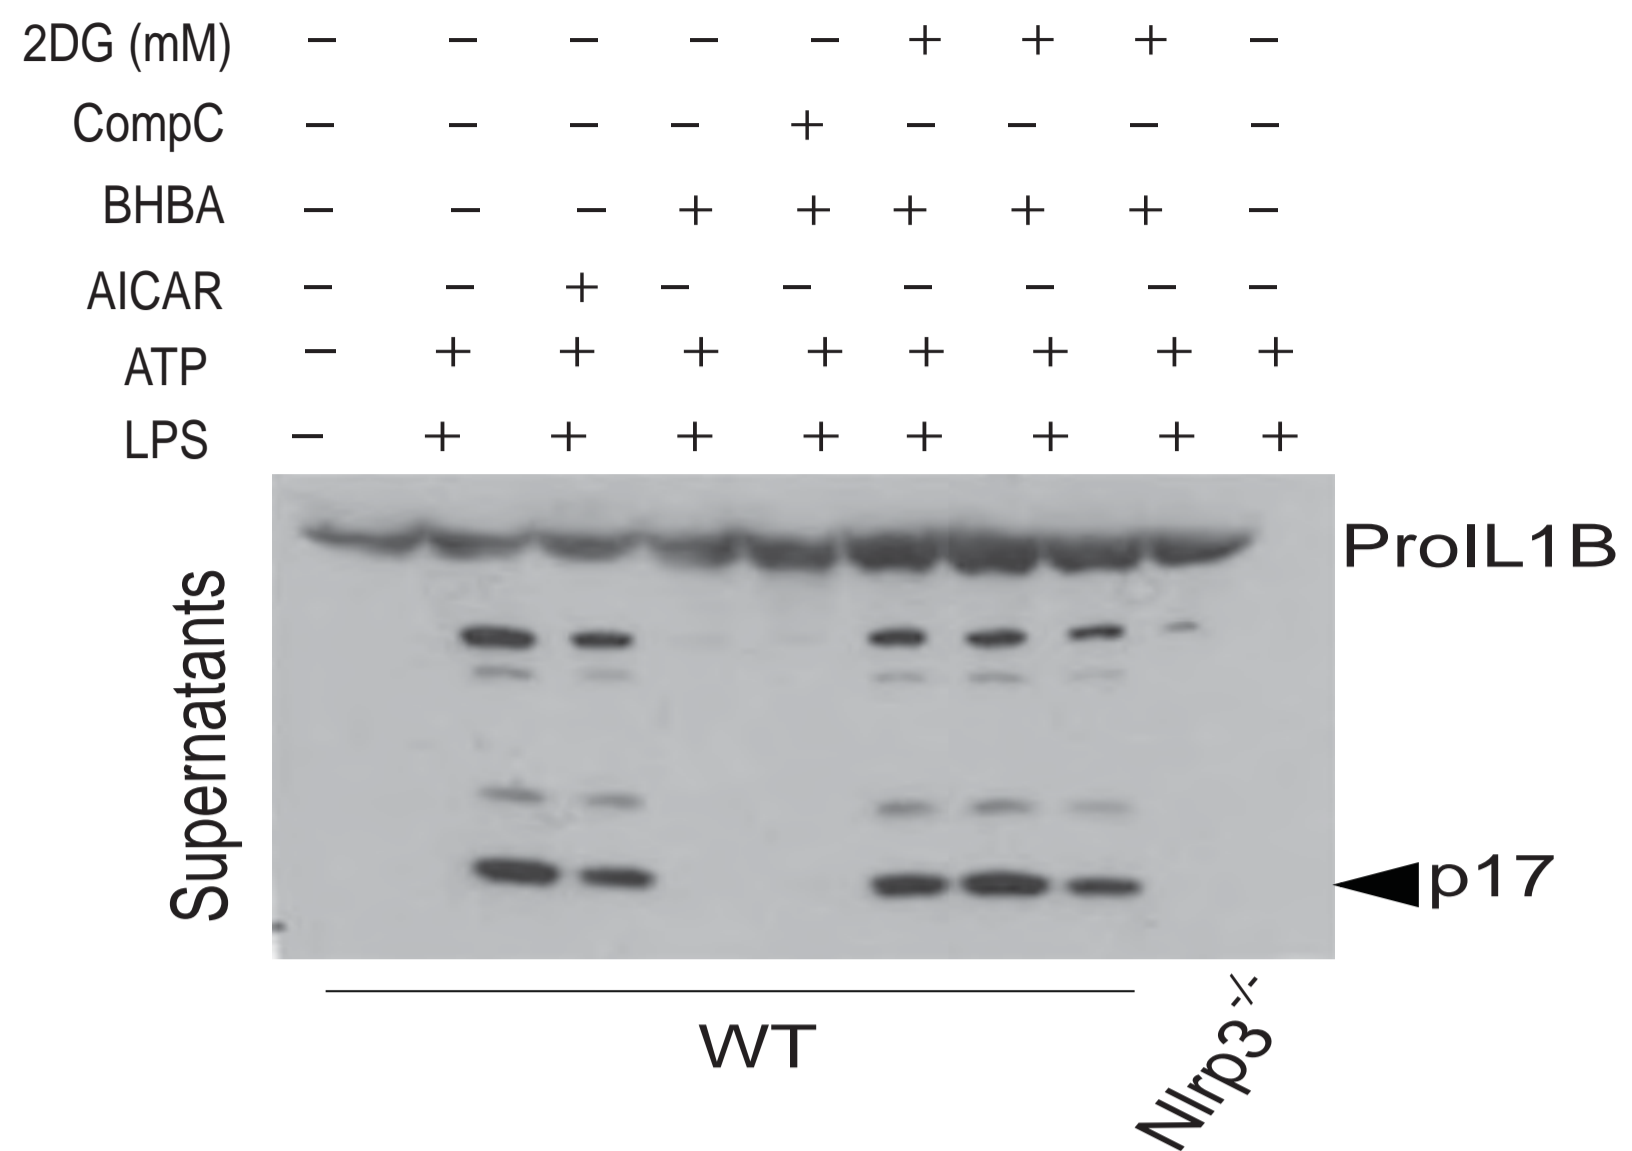**b**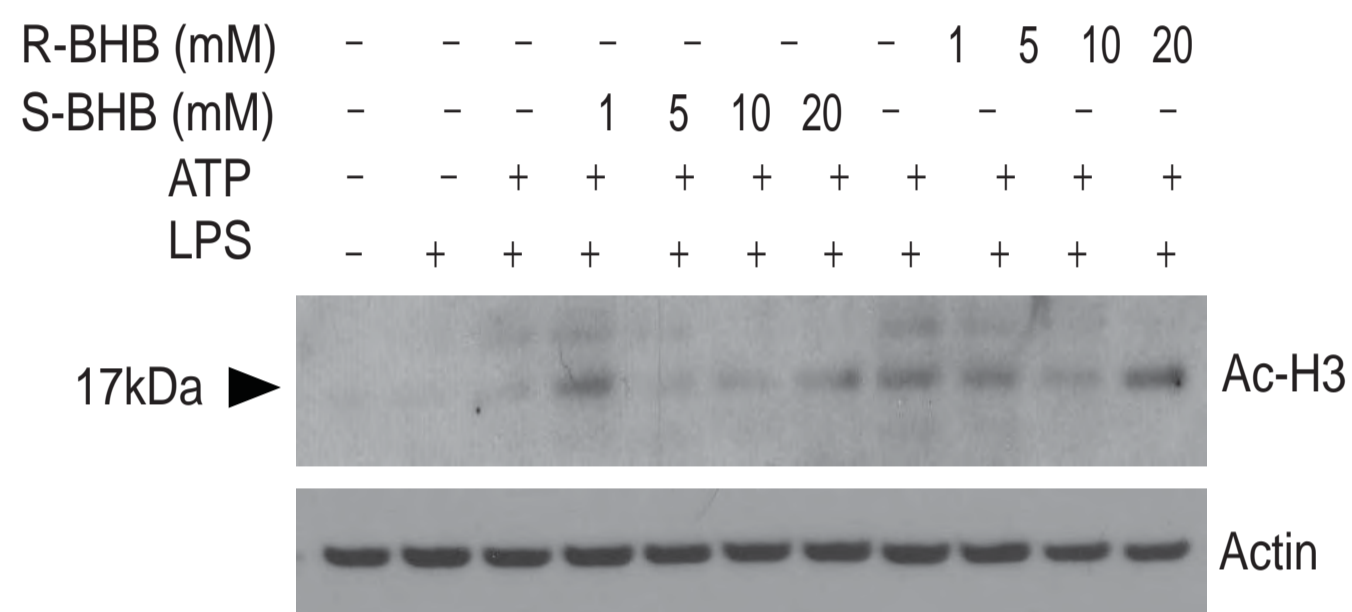

**Supplementary Figure 3** BHB induces H3 acetylation and does not require glycolysis to block NLRP3.

(a,b) Western blot analysis of caspase1 in BMDMs primed with LPS for 4 hours and stimulated with 2DG (0.5, 1, 5 mM), AICAR and Compound C and BHB for 1h on indicated combinations. LPS primed BMDMs were treated with ATP and S or D-BHB for 1h and H3 acetylation was evaluated by western blot. The experiments were repeated at least thrice.

**Youm *et al* Supplementary Fig.3**

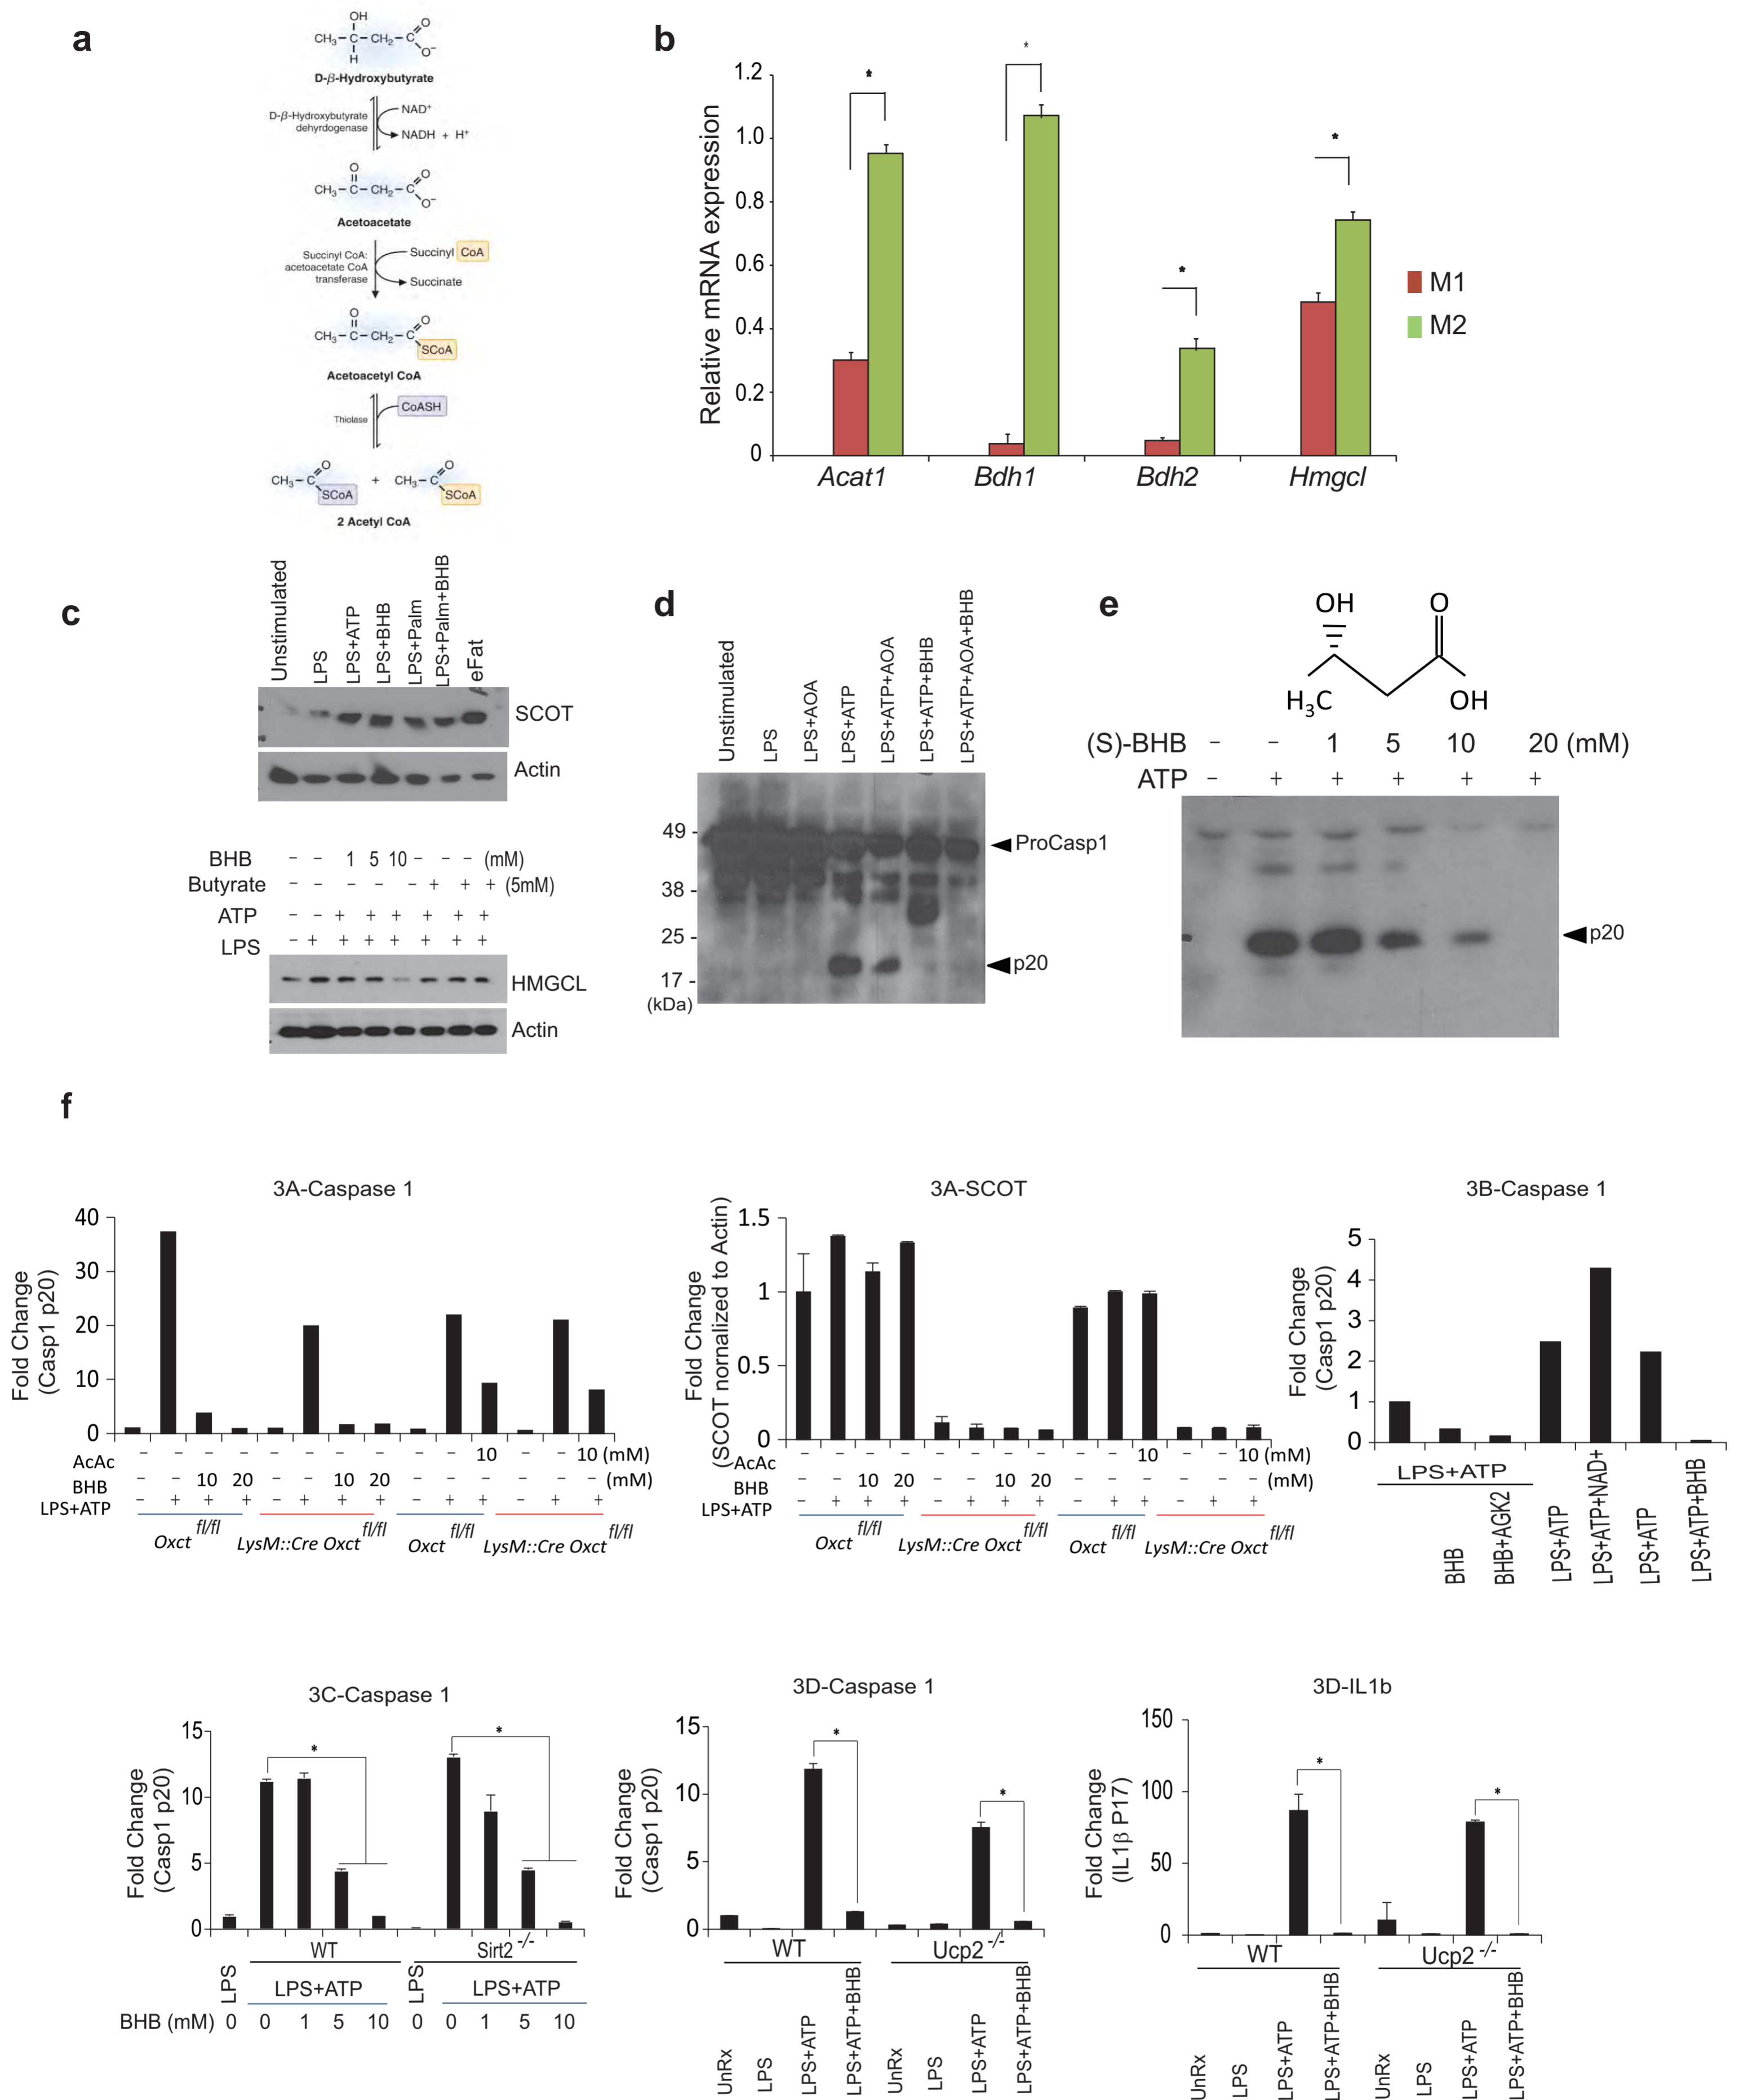

**Supplementary Figure 4** Macrophages express ketogenic and ketolytic genes but BHB does not require entry in TCA cycle to block NLRP3.

- (a) Ketolytic pathway of generation of acetyl coA.
- (b) The differential mRNA expression of ketolytic and ketogenic enzymes in M1 and M2 polarized macrophages. Data are expressed as mean  $\pm$  S.E.M (\* $p < 0.05$ ). The BMDMs from derived from 6 mice were used and experiment was repeated thrice.
- (c) Western blot analysis of SCOT and HMGCL expression in BMDMs in response to inflammasome activators and butyrate and BHB.
- (d) The caspase-1 activation in LPS primed BMDMs incubated in presence of TCA cycle entry inhibitor AOA (1mM) for 1 hour in presence or absence of ATP and BHB.
- (e) The effect of enantiomer, L or (S)-  $\beta$ hydroxybutyrate on Nlrp3 induced caspase-1 activation in BMDMs.
- (f) All bar graphs represent quantitation of p20 caspase1, p17 and SCOT band intensity as fold change by normalizing to inactive p48 procaspase-1, proIL1 $\beta$  and actin. Data are expressed as mean  $\pm$  S.E.M (\* $p < 0.05$ ) from cells derived from five (3a) six (3b,c), mice with each independent experiment carried out in triplicate.

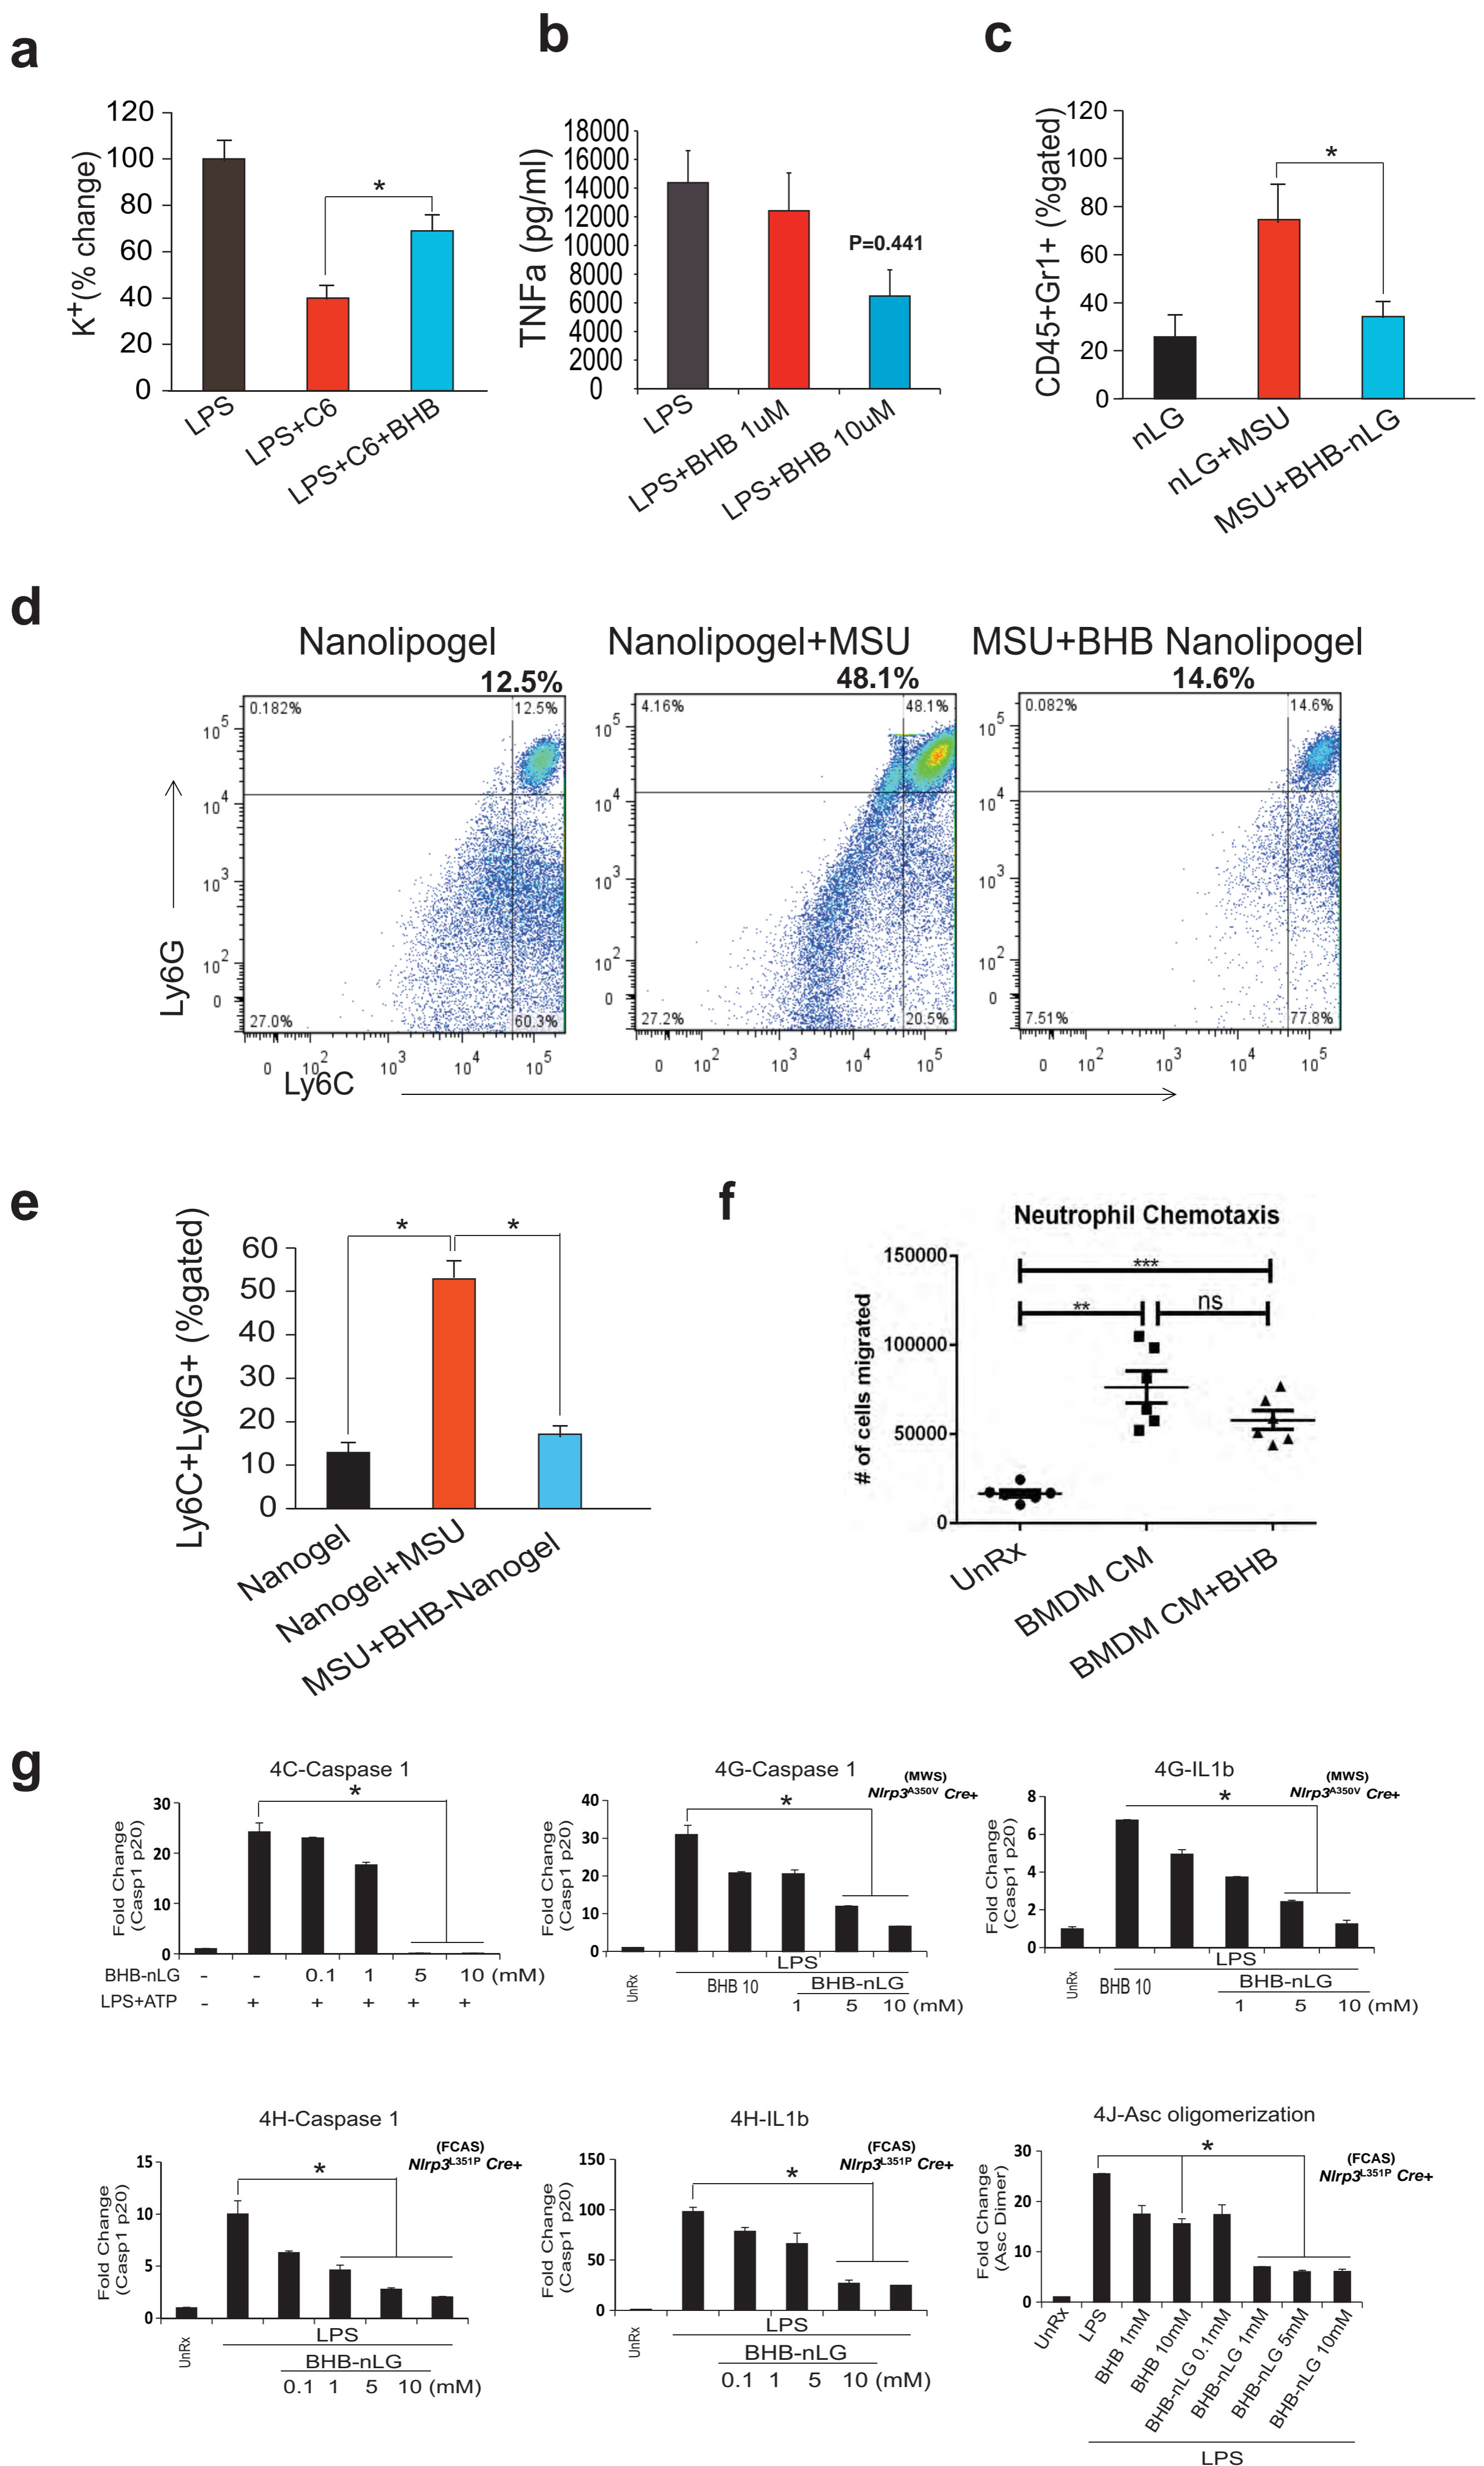

**Supplementary Figure 5 BHB nanolipogels block inflammation.**

- (a) The intracellular potassium levels in LPS primed BMDMs treated with C6 ceramide and BHB for 1h. The BMDMs from total of 5 mice were used with three technical repeats.
- (b) Human monocytes were stimulated with vehicle or LPS (1μg/mL) for 4h in presence of increasing concentrations of BHB. The TNFα was measured in supernatants using ELISA.
- (c) Quantitation of peritoneal cells stained with CD45 and Gr1 from mice treated intraperitoneally with MSU and BHB-complexed nLGs. (n = 6/group).
- (d,e,f) Peritoneal cells were stained with Ly6C and Ly6G and double positive neutrophil infiltration in mice 4h after treatment with MSU and BHB-nLGs (n = 4/group).
- (g) All bar graphs represent quantitation of p20 caspase1 and p17 band intensity as fold change by normalizing to inactive p48 procaspase-1 and proIL1β. Each experiment was repeated with cells derived from 2 femurs of at least 4-6 mice and repeated thrice. The data are presented as mean ± SEM. \*p < 0.05.

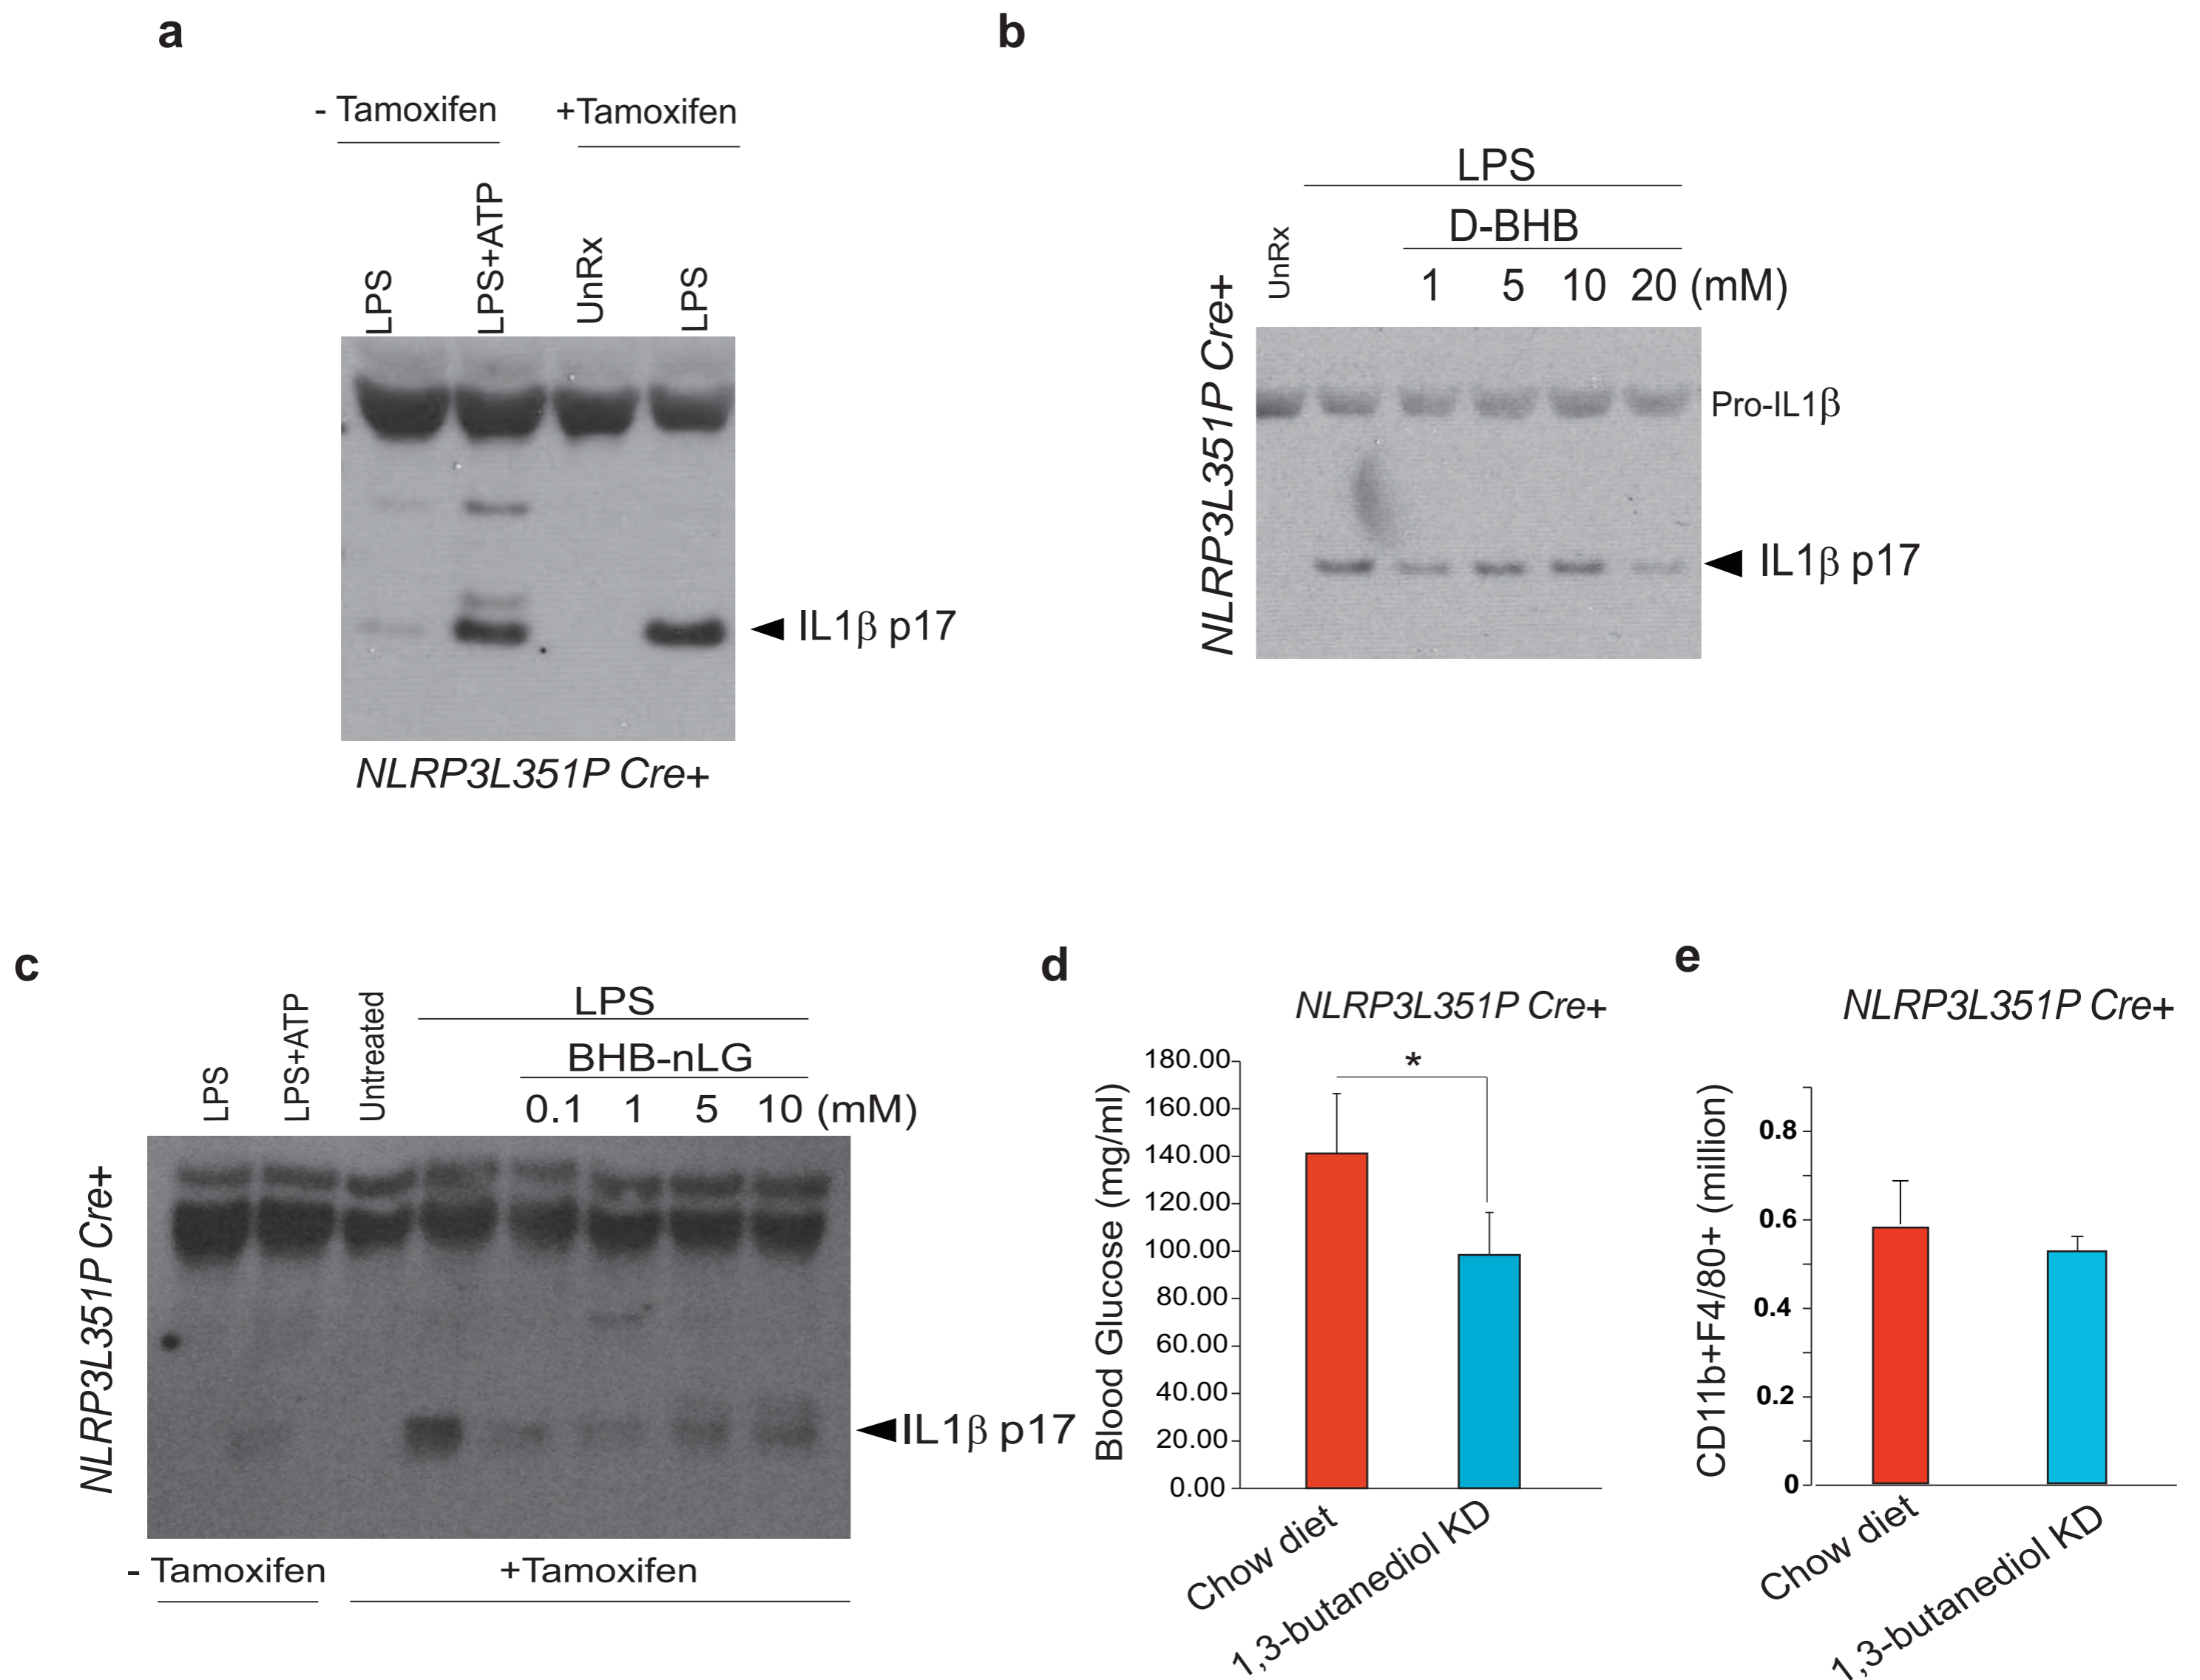

**Supplementary Figure 6** BHB inhibits NLRP3 inflammasome in FCAS mice.

- (a) The BM cells from mice (n =6) harbouring the FCAS mutation ( $NLRP3^{L351P}$ ) were treated with tamoxifen on day 6 of macrophage differentiation to induce Cre recombination and activation of NLRP3. The western blot analysis of IL1 $\beta$  in BMDMs primed with LPS alone and treated with or without tamoxifen.
- (b) The D-BHB for 1hour and various doses of D-BHB-nLGs. The experiment was repeated twice.
- (c) The IL-1 $\beta$  activation (p17) in BMDMs of FCAS mice ( $NLRP3^{L351P}$ ) treated with LPS and D-BHB-nLGs at various concentrations. Cre was induced by tamoxifen injection 24h before LPS treatment. The experiment was repeated twice.
- (d) The blood glucose levels were evaluated 3 days post tamoxifen Cre-induced NLRP3 mutation activation (n =6-8/group).
- (e) The FCAS mice ( $NLRP3^{L351P}$ ) were fed chow and ketone ester diet (1,3 butanediol, 20% by volume) for one week and peritoneal cells were removed three days after tamoxifen-induced Cre recombination. The peritoneal cells were stained with CD11b and F4/80 and quantified by Flow Cytometry. A total of 6-8 mice/group were used. The data are presented as mean  $\pm$ SEM. \*p<0.05.

**a**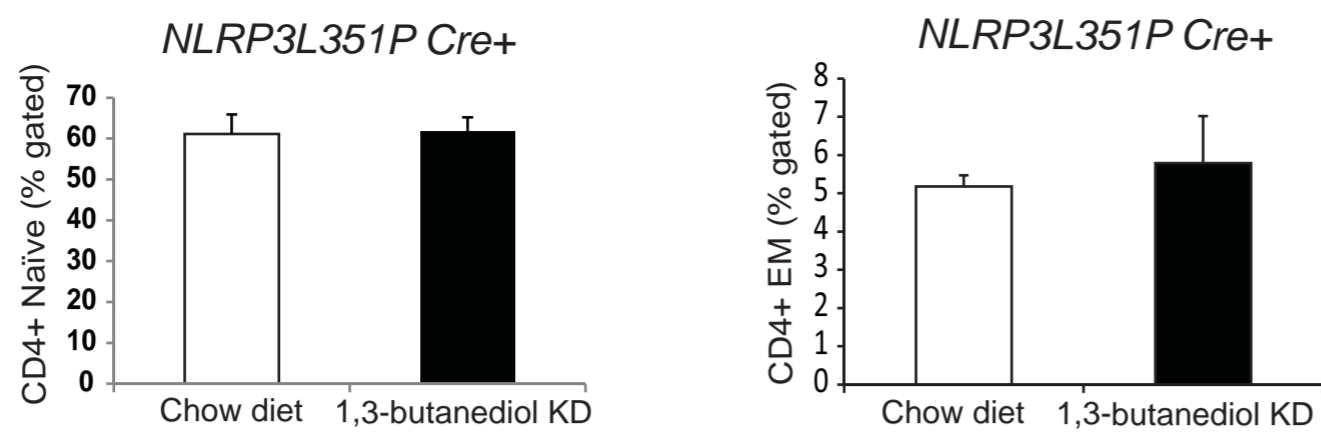**b**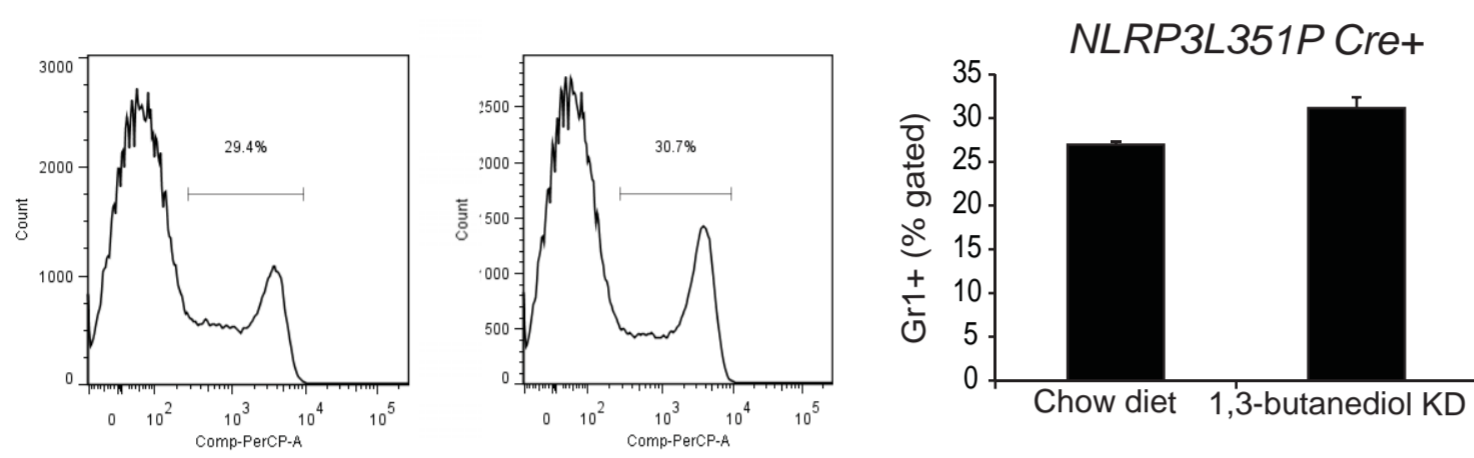**c**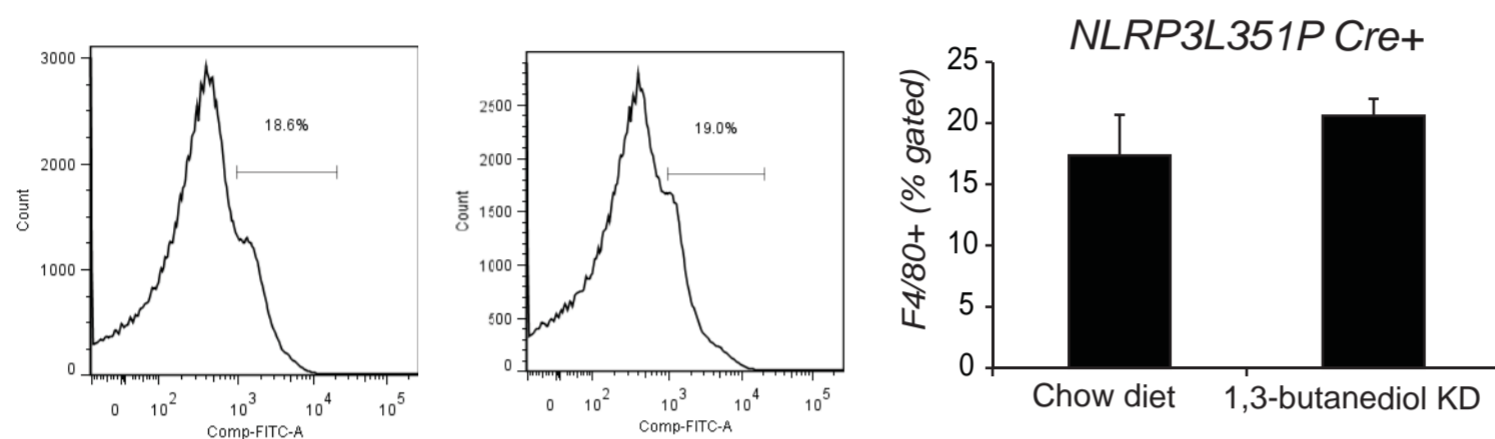**d**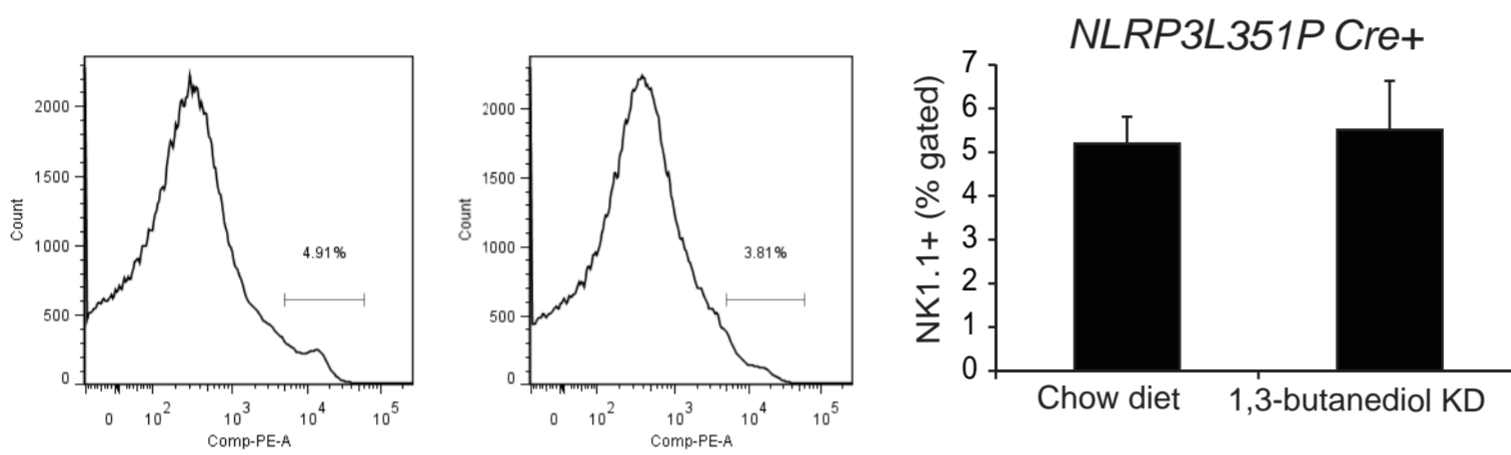

**Supplementary Figure 7** Ketone diet does not impact immune cell frequency in spleen.

(a,b,c,d) The BM cells from 8 mice harbouring the FCAS mutation (*NLRP3<sup>L351P</sup>*) were treated with tamoxifen on day 6 of macrophage differentiation to induce Cre recombination and activation. The data are presented as mean  $\pm$ SEM. \* $p < 0.05$ .

**Youm *et al* Supplementary Fig.7**

a

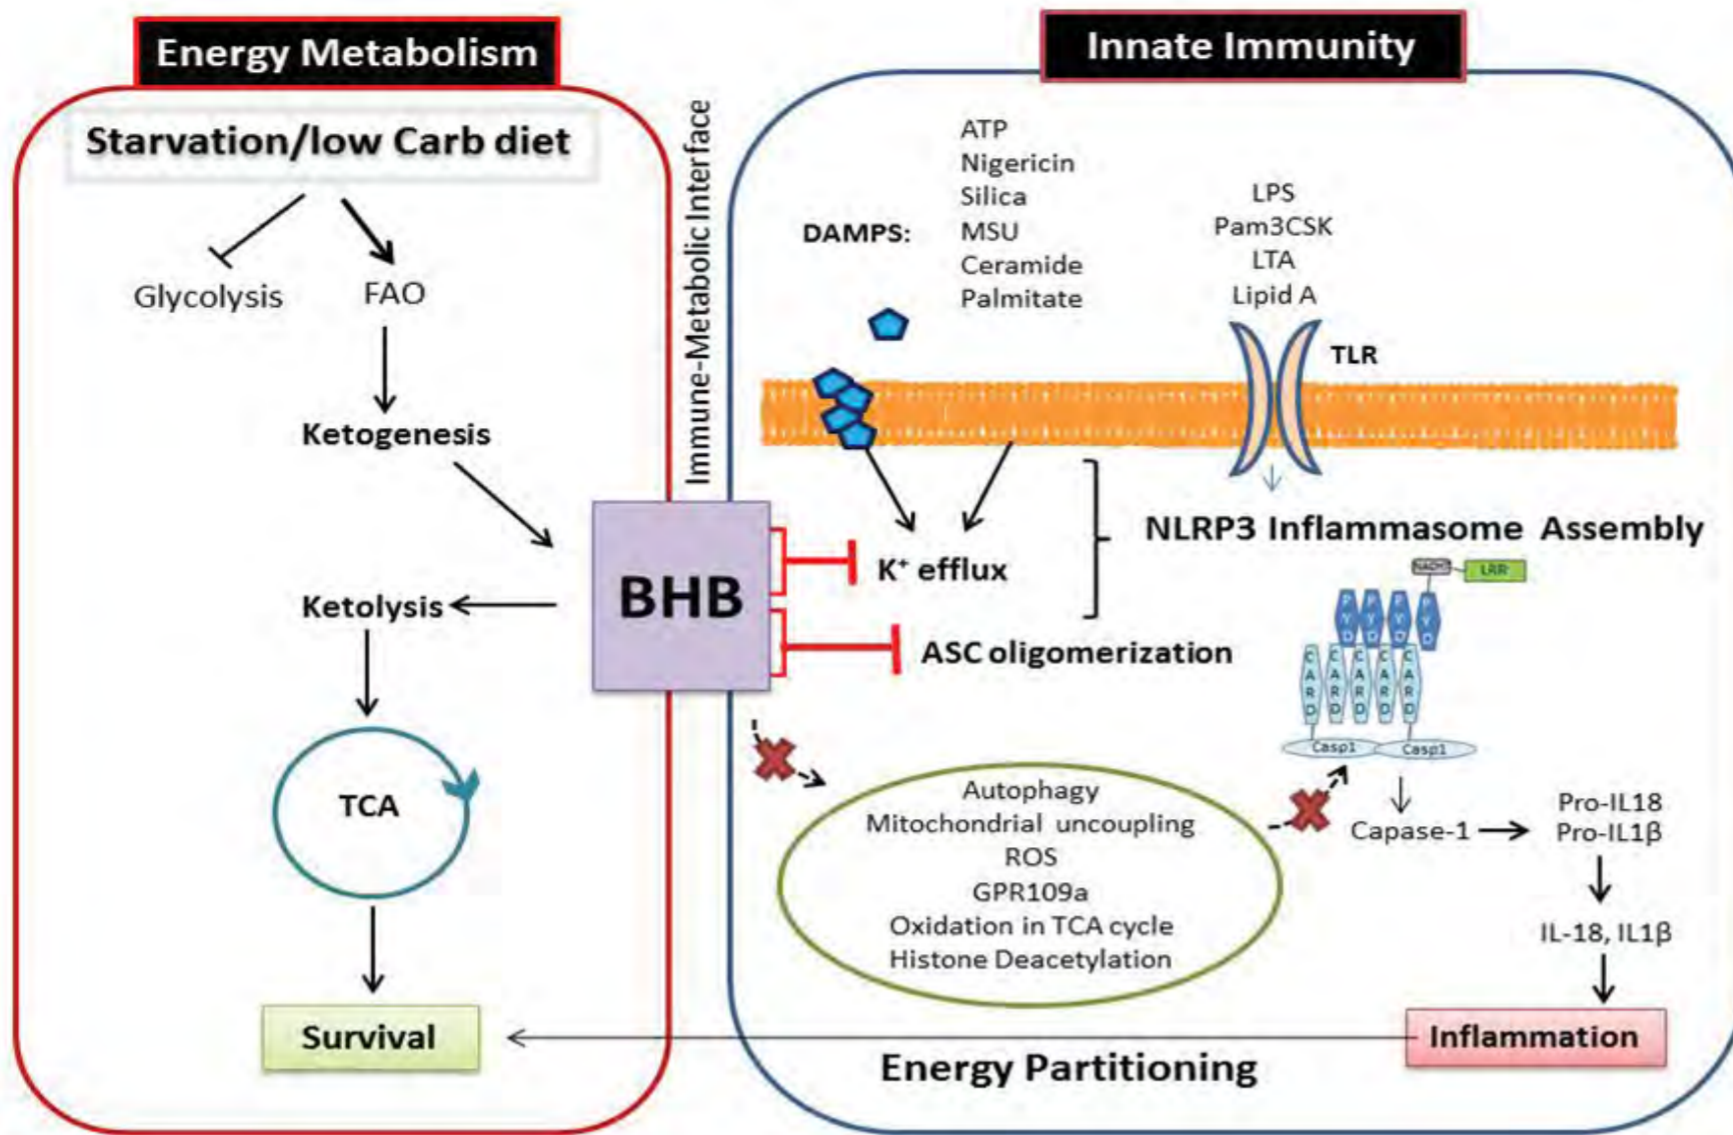

**Supplementary Figure 8** Schematic illustration the proposed model of action of BHB on the NLRP3 inflammasome.

(a) Schematic illustrating the proposed mechanism of action of BHB on the NLRP3 inflammasome in macrophages.

**Youm *et al* Supplementary Fig.8**
